# Supplementary material for: Factor XIII-A transglutaminase deficient mice show signs of metabolically healthy obesity on high fat diet
Source: PubMed Central journal article supplement (PMC5069677; doi:10.1038/srep35574), 2016-10-19
Supplement: srep35574-s1.pdf [file srep35574-s1.pdf]

**Factor XIII-A transglutaminase deficient mice show signs of metabolically healthy obesity on high fat diet**

**Vamsee D. Myneni<sup>1</sup> and Mari T. Kaartinen<sup>1,2</sup>**

<sup>1</sup>Faculty of Dentistry, McGill University, Montreal, QC, Canada,

<sup>2</sup>Division of Experimental Medicine, Department of Medicine, Faculty of Medicine, McGill University, Montreal, QC.

## Supplemental Information Figure S1

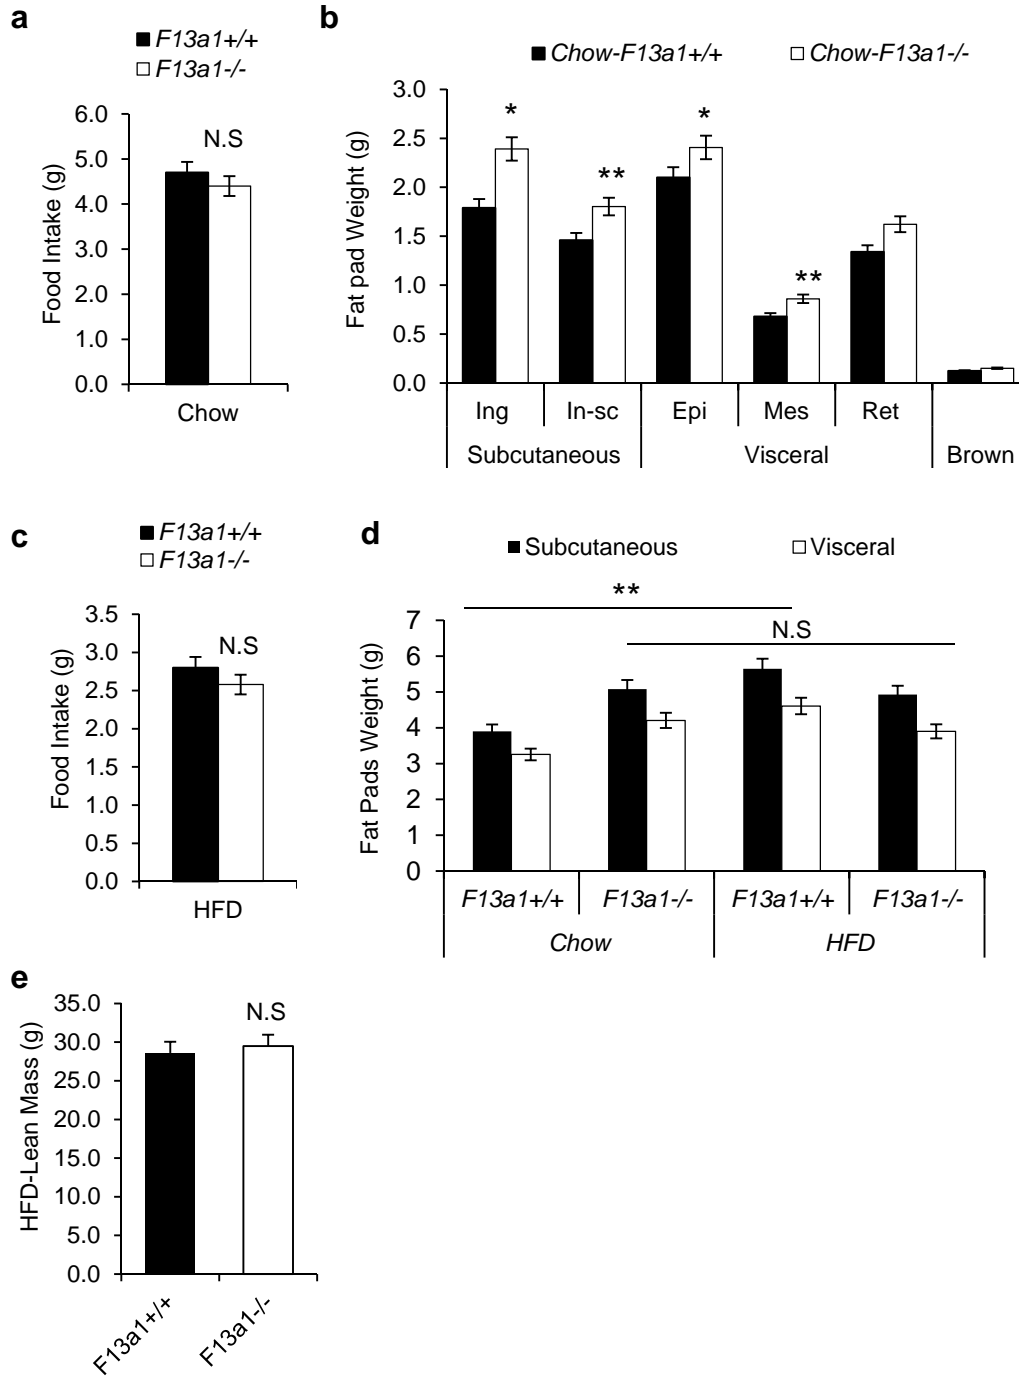

## Supplemental Information Figure S2

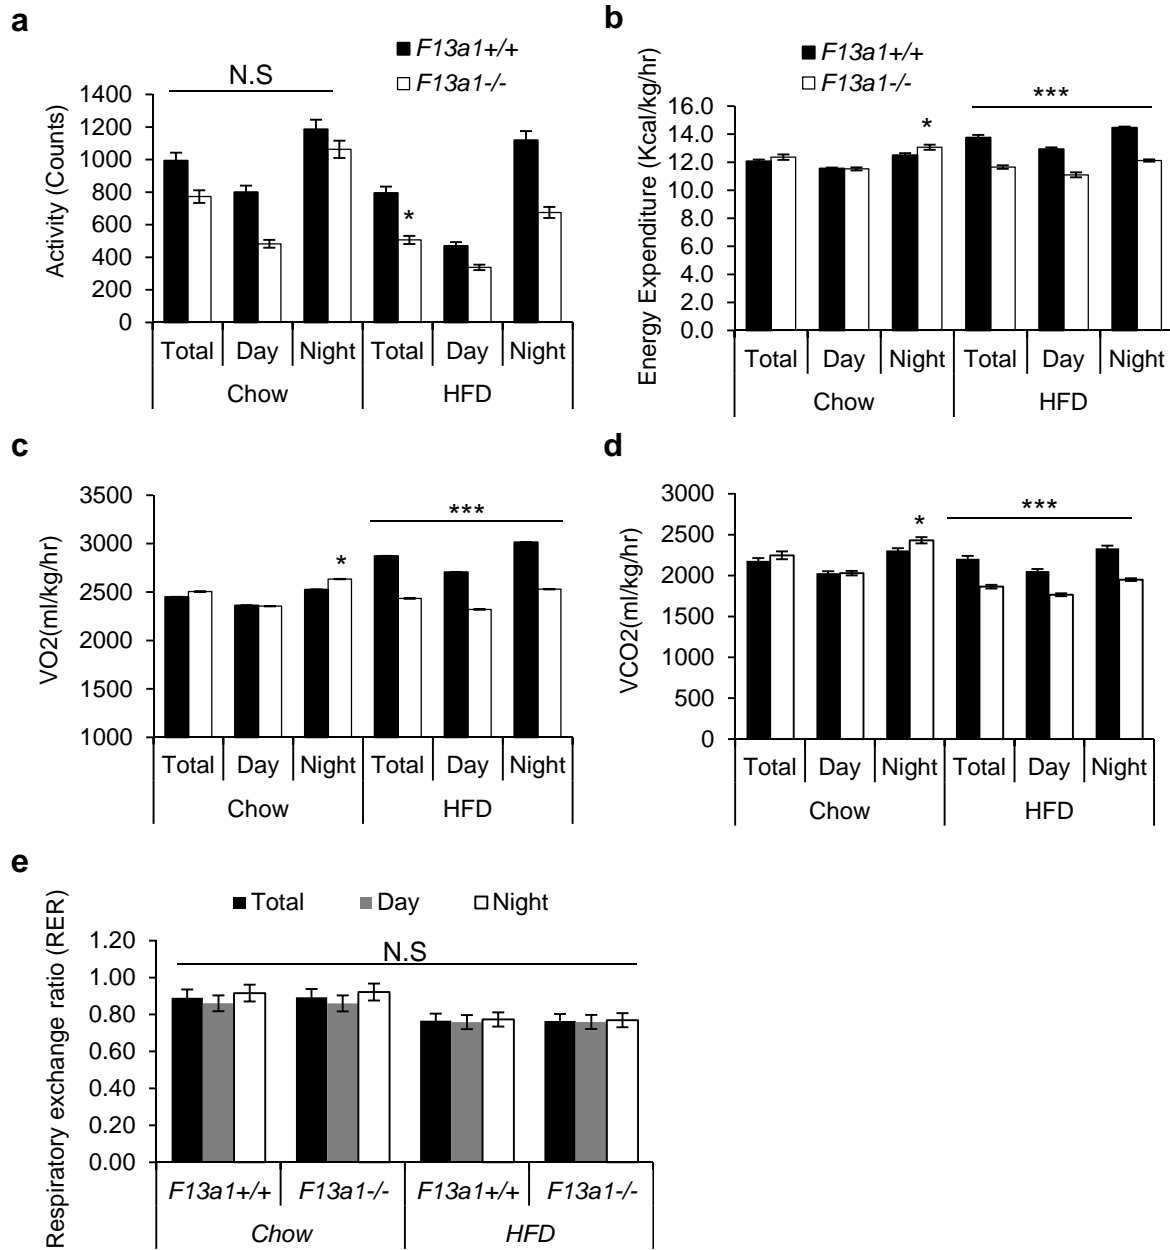

Supplemental Information  
Figure S3

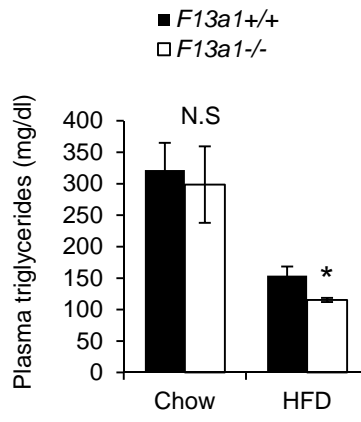

## Supplemental Information Figure S4

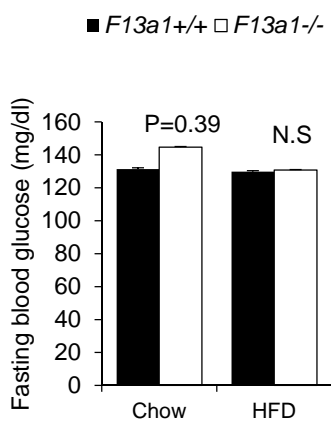

Supplemental Information  
Figure S5

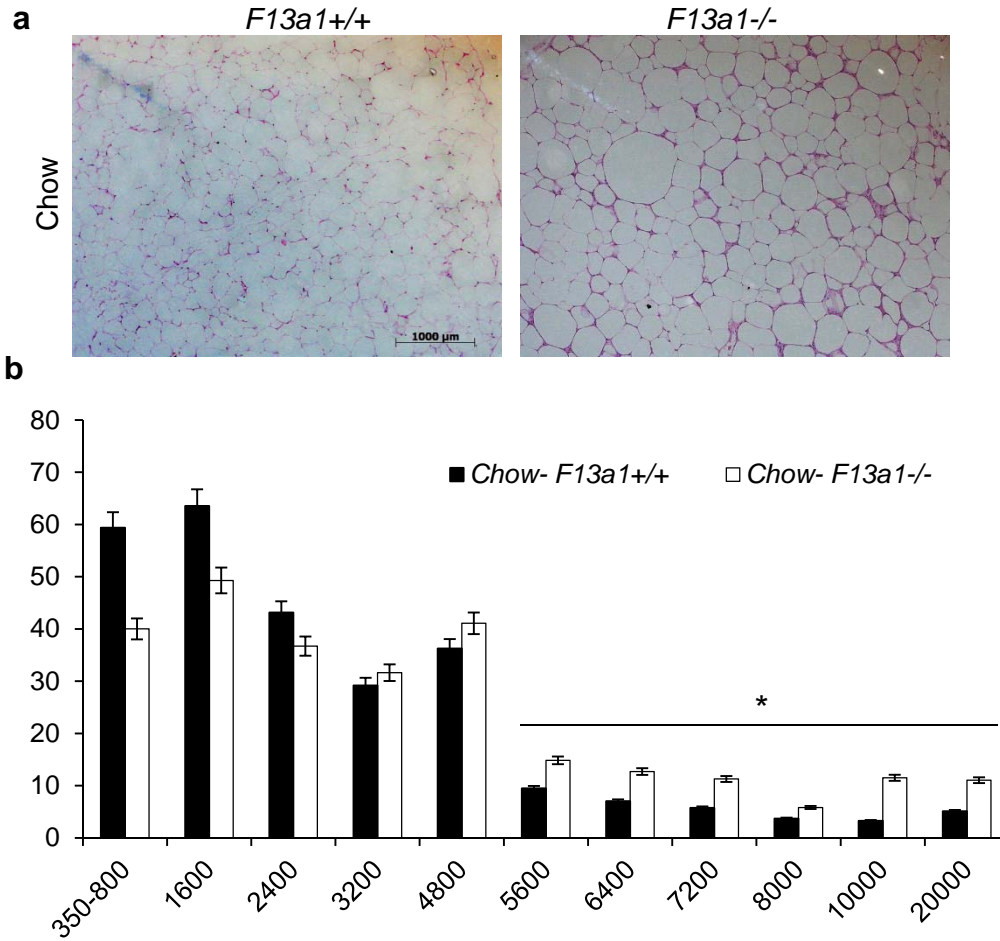

Supplemental Information  
Figure S6

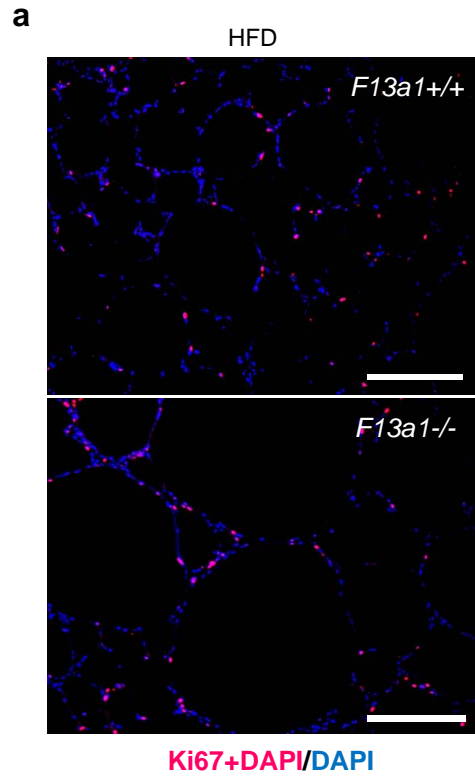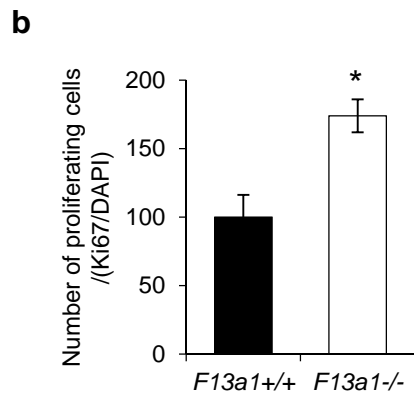

**Supplemental Information  
Figure S7**

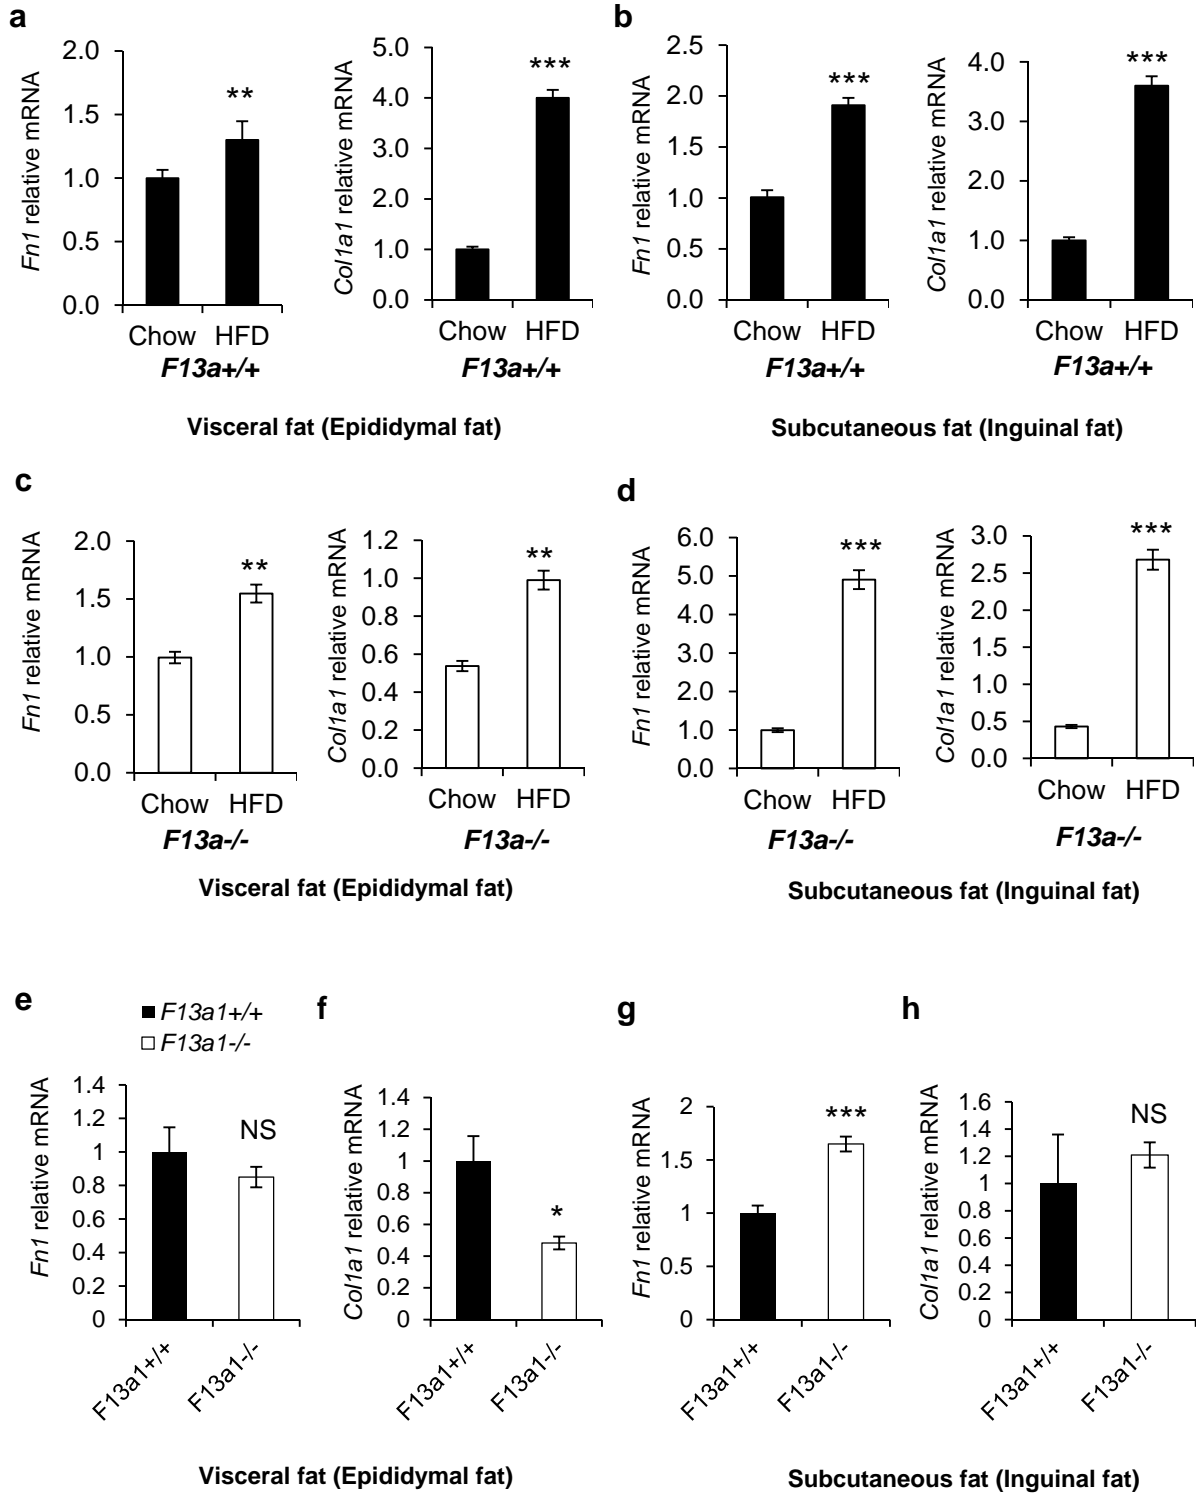



Supplemental Information  
Figure S8

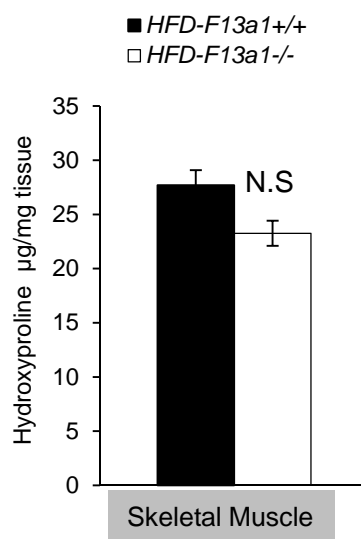

## Factor XIII-A transglutaminase deficient mice show signs of metabolically healthy obesity on high fat diet

Vamsee D. Myneni and Mari T. Kaartinen

### Supplementary figure legends

**Figure S1. Increased fat pad weight in *F13a1*<sup>-/-</sup> mice fed on chow diet. (a)** Food intake of *F13a1*<sup>-/-</sup> and *F13a1*<sup>+/+</sup> mice on chow diet (n=4 mice/group). **(b)** Individual fat pad's weight of *F13a1*<sup>-/-</sup> and *F13a1*<sup>+/+</sup> mice fed chow diet. Subcutaneous fat: inguinal (Ing) and inter-scapular (In-sc); Visceral: epididymal (Epi), mesenteric (Mes) and Retroperitoneal (Ret) fat pads; and brown fat (n=10-16 mice/group). **(c)** Food intake of *F13a1*<sup>-/-</sup> and *F13a1*<sup>+/+</sup> mice on HFD (n=4 mice/group). **(d)** Subcutaneous and visceral fat pad weight from *F13a1*<sup>-/-</sup> and *F13a1*<sup>+/+</sup> mice on chow and HFD; *F13a1*<sup>-/-</sup> mice do not show redistribution of fat mass on both chow and HFD (data is collected from Figures S1b and 1d). **(e)** HFD Lean Mass measured by EchoMRI (n=4 mice/group). No changes are observed. All error bars represent SEM; \*p<0.05; \*\*p<0.01; N.S-Not Significant.

**Figure S2. Reduced activity and energy expenditure of *F13a1*<sup>-/-</sup> mice on HFD.** Metabolic cage measurements were taken during the day (light) and night (dark) cycles over the course of four days. **(a)** Total activity (ambulatory and rearing) was reduced in *F13a1*<sup>-/-</sup> mice on HFD. **(b)** Energy expenditure was reduced in *F13a1*<sup>-/-</sup> mice on HFD. **(c)** Oxygen consumption (VO<sub>2</sub>) was significantly lower in *F13a1*<sup>-/-</sup> mice on HFD. **(d)** Carbon dioxide production (VCO<sub>2</sub>) was significantly lower in *F13a1*<sup>-/-</sup> mice on HFD. **(e)** Gas exchange data used to calculate the respiratory exchange ratio (RER=VO<sub>2</sub>/VCO<sub>2</sub>). All error bars represent SEM. (n=4 mice/group) \*p<0.05; \*\*p<0.01; \*\*\*p<0.001, N.S-Not Significant.

**Figure S3. Plasma triglyceride levels on chow and HFD.** Plasma triglyceride levels of *F13a1*<sup>-/-</sup> and *F13a1*<sup>+/+</sup> mice on HFD are significantly lower in *F13a1*<sup>-/-</sup> compared to control mice. All error bars represent SEM; (n=4 mice/group); \*p<0.05, , N.S-Not Significant.

**Figure S4. Fasting blood glucose levels are not affected.** Blood glucose levels are measured after 6 h fast (7:00 am-1:00 pm). No significant differences are seen between *F13a1*<sup>-/-</sup> and *F13a1*<sup>+/+</sup> mice on chow or HFD. All error bars represent SEM. (n=8 mice/group) N.S-Not Significant.

**Figure S5. Larger adipocytes in WAT of *F13a1*<sup>-/-</sup> mice on chow.** (a) Hematoxylin and Eosin (H&E) stained sections of epididymal fat pad. Scale bar equals 1000  $\mu$ m (b) Frequency distribution of adipocytes in mice on chow diet; the frequency of larger adipocytes was increased in *F13a1*<sup>-/-</sup> mice. Error bars represent SEM. (n=4 mice/group) \*p<0.05.

**Figure S6. Increased cell proliferation in WAT of *F13a1*<sup>-/-</sup> mice on HFD.** (a) Immunofluorescence staining of the epididymal fat pad of *F13a1*<sup>-/-</sup> and *F13a1*<sup>+/+</sup> mice on HFD for Ki67 (red) and nuclei/DAPI (blue). Proliferating cells shown in pink nuclei (merge of Ki67 and DAPI). Scale bar equals 200  $\mu$ m. (b) Graph represents quantification of proliferating cells, number of Ki67 positive cells (nuclei) normalized to the total number of DAPI. Error bars represent SEM. (n=4 mice/group) \*p<0.05.

**Figure S7. mRNA expression of *Fn1* and *Col1a1* in epididymal and inguinal fat pads on HFD.** (a) *Fn1* and *Col1a1* mRNA levels in epididymal fat pad on chow and HFD of *F13a1*<sup>+/+</sup> mice. (b) *Fn1* and *Col1a1* mRNA levels in inguinal fat pad on chow and HFD of *F13a1*<sup>+/+</sup> mice. (c) *Fn1* and *Col1a1* mRNA levels in epididymal fat pad on chow and HFD of *F13a1*<sup>-/-</sup> mice. (d) *Fn1* and *Col1a1* mRNA levels in inguinal fat pad on chow and HFD of *F13a1*<sup>-/-</sup> mice. (e) *Fn1*

mRNA levels in epididymal fat pad of *F13a1*<sup>+/+</sup> and *F13a1*<sup>-/-</sup> mice on HFD. **(f)** *Col1a1* mRNA levels in epididymal fat pad of *F13a1*<sup>+/+</sup> and *F13a1*<sup>-/-</sup> mice on HFD. **(g)** *Fn1* mRNA levels in inguinal fat pad of *F13a1*<sup>+/+</sup> and *F13a1*<sup>-/-</sup> mice on HFD. **(h)** *Col1a1* mRNA levels in inguinal fat pad of *F13a1*<sup>+/+</sup> and *F13a1*<sup>-/-</sup> mice on HFD. All error bars represent SEM; (n=4 mice/group); \*p<0.05.

**Figure S8. The collagen content of skeletal muscle was not affected in *F13a1*<sup>-/-</sup> mice on HFD.** Hydroxyproline assay of total protein extracts from skeletal muscle of *F13a1*<sup>-/-</sup> and *F13a1*<sup>+/+</sup> mice on HFD. (n=4 mice/group). Error bars represent SEM; N.S-Not Significant.
